# Supplementary material for: Human Papilloma Virus Associated Oropharyngeal Squamous Cell Carcinoma: Epidemiological and Biological Factors Associated with Local and Distant Recurrence
Source: Research Square preprint supplement (doi:10.21203/rs.3.rs-7887859/v1), 2025-12-04
Supplement: Supplementary file 1 [file bc6f0819373a5bdf731374e9.docx]

***Supplementary Table 1*** *List of the HPV Genotypes Targeted via Ion Torrent Next Generation Sequencing.*

| HPV Genotypes | | |
| --- | --- | --- |
| High Risk | Probable High Risk | Low Risk |
| 16 | 26 | 6 |
| 18 | 53 | 11 |
| 31 | 66 |  |
| 33 | 67 |
| 35 | 70 |
| 39 | 73 |
| 45 | 83 |
| 51 | 30 |
| 52 | 34 |
| 56 | 69 |
| 58 | 85 |
| 59 | 97 |
| 68 |  |

***Supplementary Table 2*** *Regions of Interest for the smMIP Panel.*

*Abbreviations: EGFR, Epidermal Growth Factor Receptor; PDGFRA, Platelet Derived Growth Factor Receptor A*

| Gene | Minimum Coverage |
| --- | --- |
| BRAF | Exon 15/V600 |
| EGFR | Exon 8, 19, 10, 21 |
| ERBB2 | Exon 20 |
| KIT | Exon 8, 9, 11, 13, 14, 17 |
| KRAS | Codons 12, 13, 61, 117, 146 (Exons 2, 3, 4) |
| MET | Exon 14 |
| NRAS | Codons 12, 13, 61 (Exons 2, 3) |
| PDGFRA | Exons 12, 14, 18 |

***Supplementary Table 3*** *TNM Staging Classification of the Primary Oropharyngeal Cancers.*

| TNM 7th Edition Staging Classification of Oropharyngeal Cancers | | | |
| --- | --- | --- | --- |
| Clinical |  | **Pathological** |  |
| T |  | **T** |  |
| Not Stated | 3 | **Not Stated** | 2 |
| X | - | **X** | 45 |
| 1 | 9 | **1** | 8 |
| 2 | 31 | **2** | 9 |
| 3 | 14 | **3** | 0 |
| 4 | 10 | **4** | 1 |
| Not Subcategorized | 5 |  |  |
| 4a | 3 |  |  |
| 4b | 2 |  |  |
|  | | | |
| N |  | **N** |  |
| Not Stated | 1 | **Not Stated** | 2 |
| 0 | 13 | **0** | 3 |
| 1 | 11 | **1** | 7 |
| 2 | 37 | **2** | 13 |
| 2a | - | **2a** | 5 |
| 2b | - | **2b** | 8 |
| 2c | - | **2c** | 0 |
| 3 | 5 | **3** | 0 |
| X | - | **X** | 40 |
|  | | | |
| M |  | **M** |  |
| Not Stated | 1 | **Not Stated** | 2 |
| 0 | 63 | **0** | 0 |
| 1 | 3 | **1** | 0 |
| X | - | **X** | 63 |
|  | | | |
|  |  | **Staging post-Neoadjuvant Therapy** |  |
|  |  | **yTX** | 1 |
|  |  | **yT1** | 1 |
|  |  |  |  |
|  |  | **yN0** | 1 |
|  |  | **yN1** | 1 |
|  |  |  |  |
|  |  | **yMx** | 2 |

***Supplementary Table 4*** *AJCC/UICC Staging of Tumors for the Primary Oropharyngeal Cancers in this study.*

| AJCC/UICC 7th Edition Clinical Staging of Tumors | |
| --- | --- |
| Not Stated  I  II  III  IVA  IVB  IVC | 3  2  10  14  34  6  3 |

***Supplementary Table 5*** *Treatment Regimens Received Post Original Primary Oropharyngeal Cancer Diagnosis.*

| Treatment Regimens Received |  |
| --- | --- |
| Palliative Care Treatment | 5 |
| Chemotherapy | 1 |
| Chemotherapy/Radiotherapy | 4 |
|  | |
| Chemotherapy Regimens |  |
| Platinum Based Therapy (Carboplatin/Cisplatin) | 4 |
| Induction Docetaxel, Cisplatin, Fluorouracil followed by Carboplatin | 1 |
|  | |
| Curative Intent Treatment | 62 |
| Surgical Resection of Primary Tumor | 23 |
| Unknown | 1 |
| Chemotherapy/Radiotherapy | 60 |
|  | |
| Chemotherapy Regimens | 58 |
| Platinum Based Therapy (Carboplatin/Cisplatin) | 48 |
| Cetuximab | 3 |
|  | |
| Induction Chemotherapy Followed by Alternate Regimen | 4 |
| Docetaxel, Cisplatin, Fluorouracil followed by Pegfilgrastim | 1 |
| Docetaxel, Cisplatin, Fluorouracil followed by Carboplatin | 3 |
|  | |
| Cetuximab followed by Carboplatin and Fluorouracil | 1 |
| Cisplatin followed by followed by Cetuximab and Fluorouracil | 1 |
|  |  |
| Unknown | 3 |

***Supplementary Table 6*** *Logistic Regression Model Correlating HPV 16 Genotype with LR and/or DM, When Age, Gender, Smoking and Alcohol Consumption in Excess Were Accounted For.*

| HPV 16 Genotype with Locoregional Recurrence and/or Distant Metastasis | | | | |
| --- | --- | --- | --- | --- |
| n = 54 | **Odds Ratio** | **Standard Error** | **P Value** | **95% Confidence Interval** |
|  | | | | |
| HPV 16 | 0.3076219 | 0.4340825 | **0.403** | 0.0193595  to  4.8881 |
|  |  |  |  |  |
| Age of Diagnosis (Years) | 0.9172318 | 0.0440338 | **0.072** | 0.8348631  to  1.007727 |
|  | | | | |
| Gender | 1.135898 | 1.035826 | **0.889** | 0.1901638  to  6.785009 |
|  | | | | |
| Current & Former Smoker | 1.448496 | 1.354839 | **0.692** | 0.2316077  to  9.059034 |
|  |  |  |  |  |
| Current/Previous Excessive Alcohol Consumption | 5.926142 | 4.332617 | **0.151** | 1.414023  to  24.83634 |
|  | | | | |

***Supplementary Table 7*** *Linear Regression Model Correlating Disease Free Interval with HPV 16 Genotype When Age, Gender, Smoking and Alcohol Consumption in Excess Were Accounted For.*

| HPV 16 Genotype with Disease Free Interval | | | | |
| --- | --- | --- | --- | --- |
| n = 17 | **Coefficient** | **Standard Error** | **P Value** | **95% Confidence Interval** |
|  | | | | |
| HPV 16 | 10.63746 | 9.94268 | **0.308** | -11.24623  to  32.52115 |
|  |  |  |  |  |
| Age of Diagnosis (Years) | -0.4569334 | 0.3754868 | **0.249** | -1.283374  to  0.3695074 |
|  | | | | |
| Gender | -3.347037 | 8.067892 | **0.686** | -21.10435  to  14.41027 |
|  | | | | |
| Current & Former Smoker | 9.138511 | 14.74606 | **0.549** | -23.35696  To  41.63398 |
|  |  |  |  |  |
| Current/Previous Excessive Alcohol Consumption | -13.56322 | 7.299158 | **0.090** | -29.62856  to  2.502118 |
|  | | | | |
